# Supplementary material for: Stability of Ti3C2Tx MXenes in engineered environments
Source: Royal Society of Chemistry journal article supplement (doi:10.1039/d3en00438d), 2024-01-01
Supplement: d3en00438d1.pdf [file d3en00438d1.pdf]

## Supporting Information for

### Stability of $Ti_3C_2T_x$ MXenes in Engineered Environments

**Nasim Ganji<sup>1</sup>, Christian A. Reardon-Lochbaum<sup>1</sup>, Swapnil B. Ambade<sup>2</sup>, Caroline M. Anastasia<sup>3</sup>, Patrick M. Eckhert<sup>3</sup>, Zeev Rosenzweig<sup>2</sup>, Joel A. Pedersen<sup>1,4,5</sup>, D. Howard Fairbrother<sup>3,\*</sup>**

<sup>1</sup>Department of Chemistry, University of Wisconsin–Madison, Madison, Wisconsin 53706, United States

<sup>2</sup>Department of Chemistry and Biochemistry, University of Maryland Baltimore County, Baltimore, MD 21250, United States

<sup>3</sup>Department of Chemistry, Johns Hopkins University, Baltimore, MD 21218, United States

<sup>4</sup>Departments of Soil Science and Civil & Environmental Engineering, University of Wisconsin–Madison, Wisconsin 53706, United States

<sup>5</sup>Department of Environmental Health and Engineering, Johns Hopkins University, Baltimore, Maryland 21218, United States

\*To whom correspondence should be addressed:

D. Howard Fairbrother: Phone: (410) 516-4328; e-mail: [howardf@jhu.edu](mailto:howardf@jhu.edu).

**Measuring the oxidized film's composition.** Based on XPS and EDS analysis the solid reaction products (other than the comparatively small amount of  $Ti^{4+}$  released in solution) consist of a mixture of unreacted  $Ti_3C_2$ ,  $TiO_2$ , and amorphous/graphitic carbon (C). If we describe the fractional concentrations of  $Ti_3C_2$ ,  $TiO_2$ , and amorphous/graphitic carbon (C) in the reaction product as [MXene], [ $TiO_2$ ], and [C] respectively, then;

$$[MXene] + [TiO_2] + [C] = 1 \quad (I)$$

After 1 day of exposure to chlorine:

- (1) XPS depth profiling data shows that some graphitic or amorphous carbon is formed and a small amount of  $Ti_3C_2T_x$  remains. Based on peak fitting the C 1s region (Figure S8D) the overall % MXene is determined to be  $\approx 0.35$ . Based on the of the  $Ti_3C_2$  stoichiometry of the MXene this means that:

$$[MXene]:[C] = 0.54 \quad (II)$$

- (2) EDS analysis indicates that the O:C ratio in the film is about 2.55. The oxygen signal arises exclusively from  $TiO_2$ , while the C signal comes from both  $Ti_3C_2$  and the amorphous/graphitic carbon formed. Consequently, we can write:

$$([TiO_2]/2) / (([MXene]/2) + [C]) = 2.55 \quad (III)$$

In this way, we can write three simultaneous equations with three unknowns and thereby solve for [MXene], [ $TiO_2$ ], and [C]. Solving these three simultaneous equations allows us to determine that the approximate composition of the oxidized film after 1 day of chlorine exposure to be:

$$(Ti_3C_2)_{0.07}(TiO_2)_{0.80}C_{0.13}$$

| Reaction                                              | $E^\circ / V$ |
|-------------------------------------------------------|---------------|
| $Cl_2 (g) + 2e^- \rightleftharpoons 2Cl^-$            | 1.36          |
| $Fe^{3+} + e^- \rightleftharpoons Fe^{2+}$            | 0.77          |
| $O_2 (g) + 2H_2O (l) + 4e^- \rightleftharpoons 4OH^-$ | 0.40          |

**Table S1.** The oxidative potentials of the oxidants present in three engineered environments present in this study.<sup>1</sup>

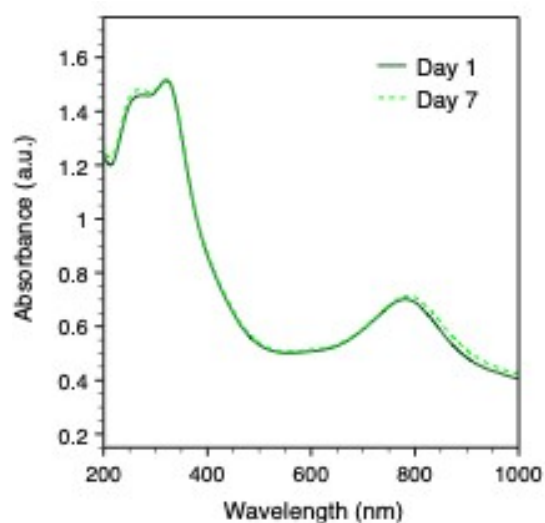

**Figure S1.** Stability of  $Ti_3C_2T_x$  colloidal suspensions ( $25 \text{ mg}\cdot\text{L}^{-1}$ ) at pH 6 over time. UV-vis spectra of  $Ti_3C_2T_x$  suspended without chlorine for 1 day and 7 days. Samples were kept open to air at room temperature throughout the experimental timeframe.

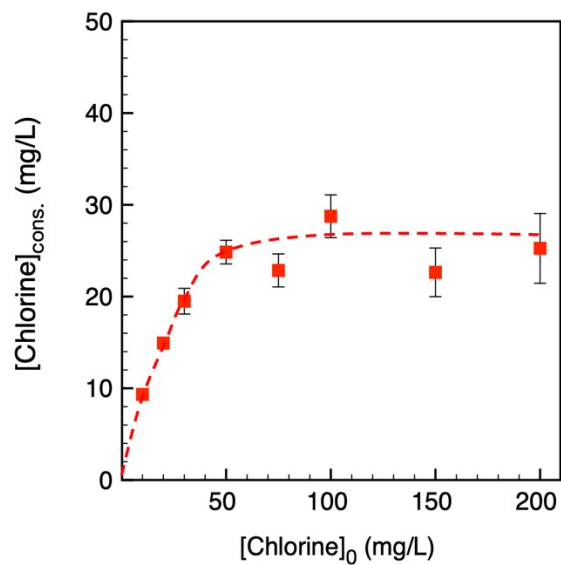

**Figure S2.** Concentration of free chlorine consumed throughout the reaction with  $\text{Ti}_3\text{C}_2\text{T}_x$  ( $25 \text{ mg}\cdot\text{L}^{-1}$ ) at pH 6 as a function of initial free chlorine concentration. Samples were kept open to air at room temperature throughout the experimental timeframe.

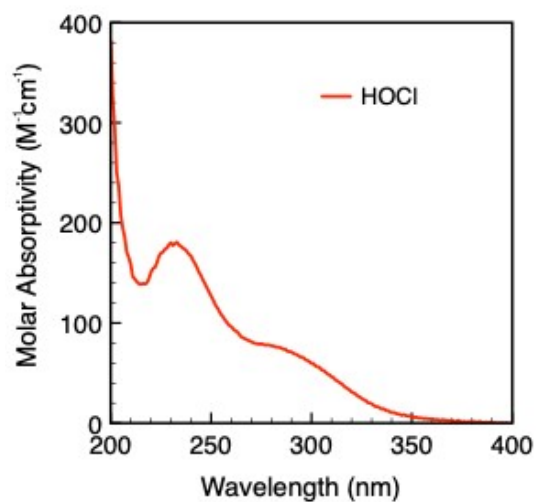

**Figure S3.** The molar absorptivity of HOCl as a function of wavelength determined from reference 2. Molar extinction coefficients of HOCl:  $\epsilon_{\text{max},235} = 98 - 101 \text{ M}^{-1} \text{ cm}^{-1,2}$

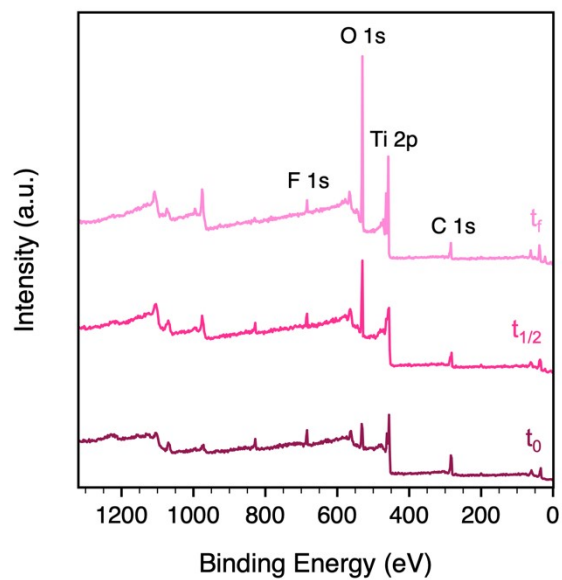

**Figure S4.** XPS survey spectra of  $\text{Ti}_3\text{C}_2\text{T}_x$  before and after exposure to  $50 \text{ mg}\cdot\text{L}^{-1}$  free chlorine at pH 6 at varying exposure times:  $t_0$ ,  $t_{1/2}$ , and  $t_f$ , correspond with exposure times resulting in  $[\text{MXene}]/[\text{MXene}]_0 = 1.00$ ,  $0.50$ , and  $\leq 0.05$ , respectively.

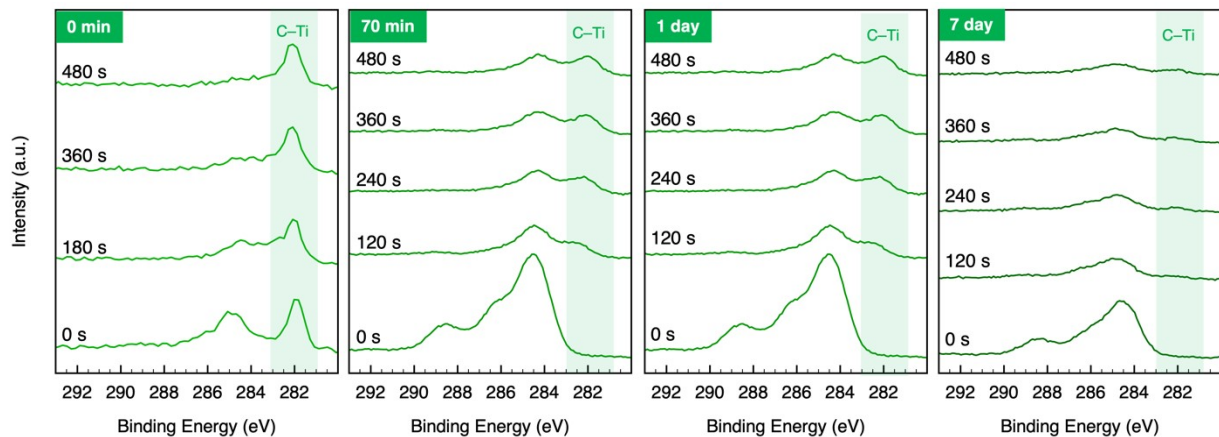

**Figure S5.** XPS depth profiles of C 1s region for  $\text{Ti}_3\text{C}_2\text{T}_x$  before and after exposure to  $50 \text{ mg}\cdot\text{L}^{-1}$  free chlorine at pH 6 after varying exposure times. The depth profile in the Ti 2p region did not show distinct peak shape change throughout the etching process except for the appearance of a lower binding energy peak around 455.4 eV which was attributed to reduced titanium produced by ion-irradiation (Figure S6).

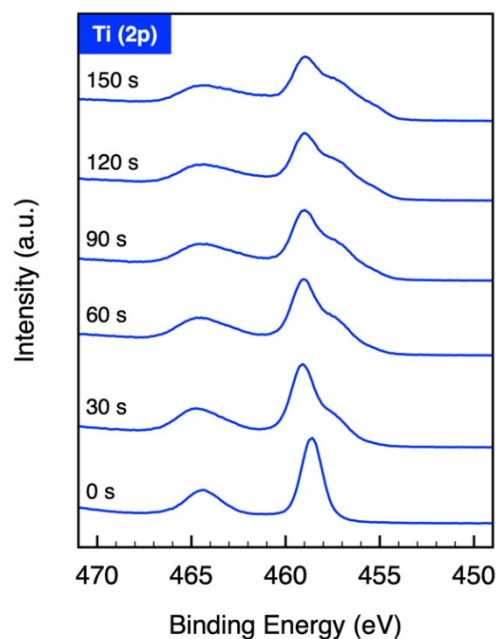

**Figure S6.** XPS depth profile of Ti 2p region for  $\text{Ti}_3\text{C}_2\text{T}_x$  after 70 min of exposure to  $50 \text{ mg}\cdot\text{L}^{-1}$  free chlorine at pH 6.

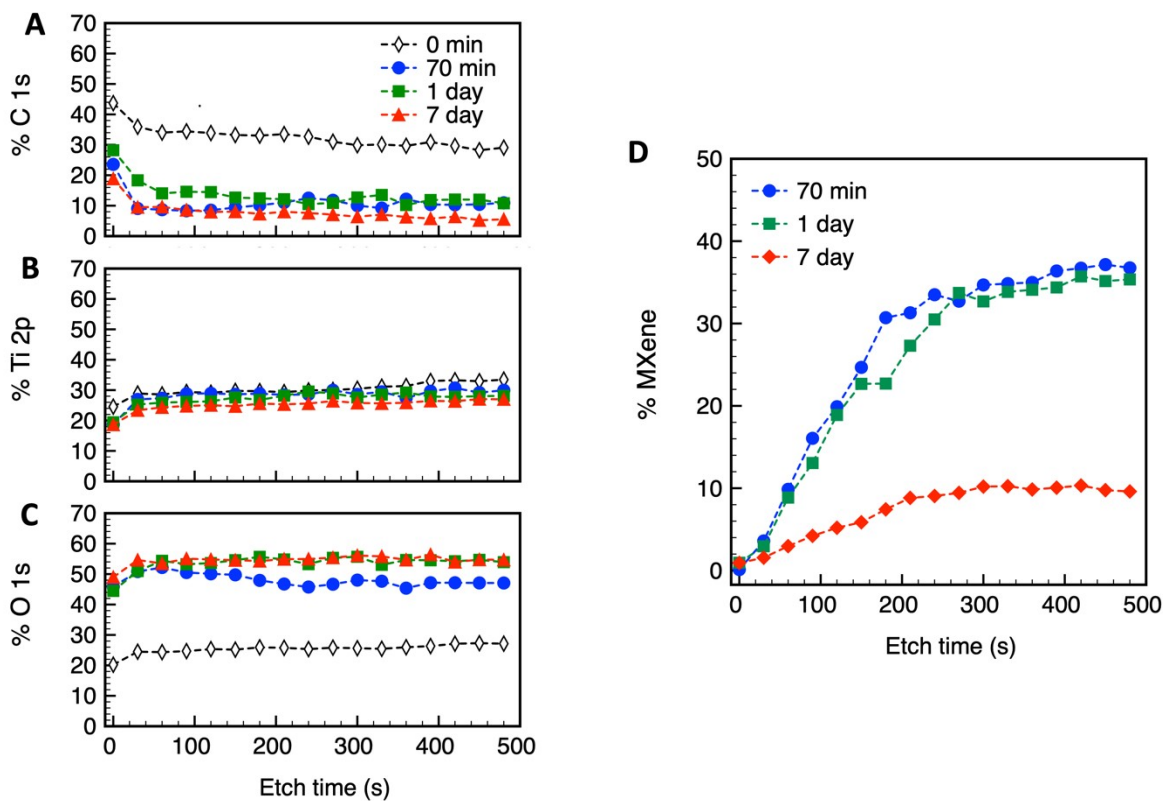

**Figure S7.** Approximate (A) C 1s, (B) Ti 2p, (C) O 1s and (D)  $Ti_3C_2T_x$  atomic percentages for pristine and oxidized MXenes at varying chlorine exposure times based on XPS depth profile analysis.

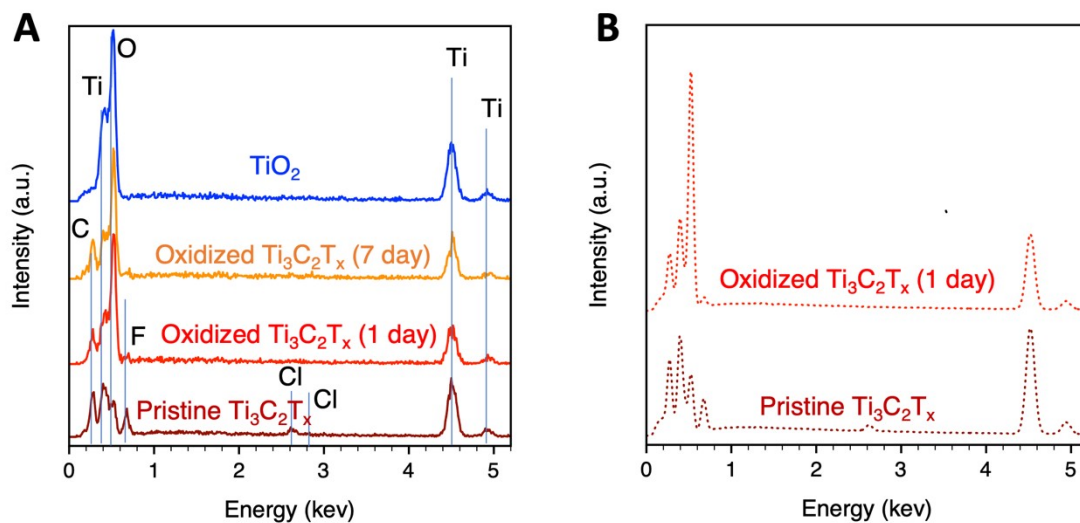

**Figure S8.** Full (A) experimental and (B) simulated EDS spectra of Ti<sub>3</sub>C<sub>2</sub>T<sub>x</sub> before and after short (1 day) and long (7 day) exposure to 50 mg·L<sup>-1</sup> free chlorine at pH 6. For reference a TiO<sub>2</sub> (anatase) powder EDS spectra is also shown in A.

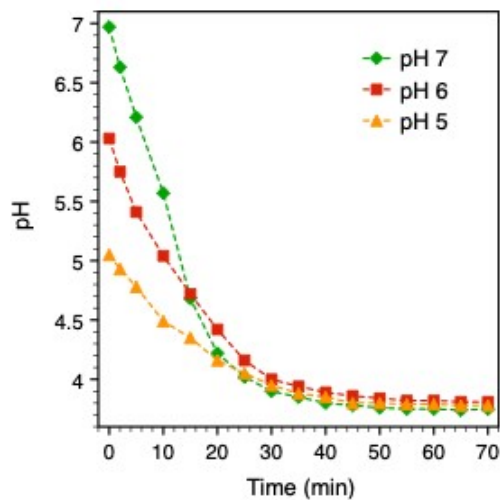

**Figure S9.** The decrease in pH of Ti<sub>3</sub>C<sub>2</sub>T<sub>x</sub> colloidal suspensions (25 mg·L<sup>-1</sup>) over time due reaction with free chlorine. Samples were prepared in DI water with 50 mg·L<sup>-1</sup> free chlorine at initial pH of 5, 6 or 7.



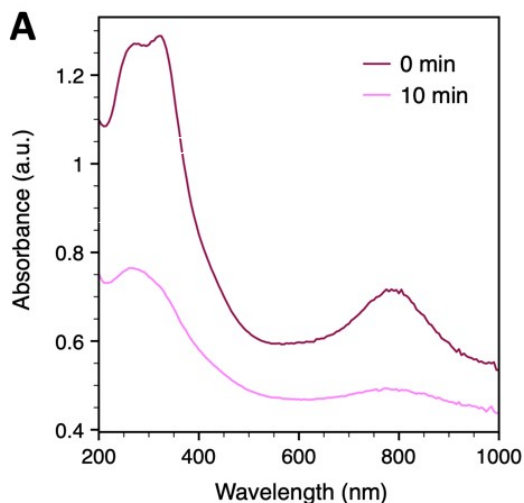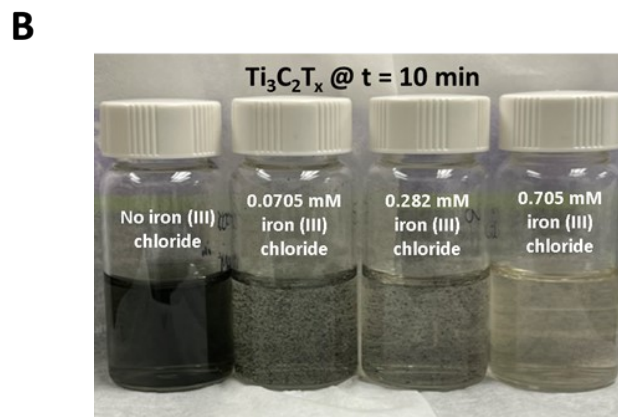

**Figure S10.** Reactivity of  $\text{Ti}_3\text{C}_2\text{T}_x$  colloidal suspensions ( $25 \text{ mg}\cdot\text{L}^{-1}$ ) with Fe(III) chloride. (A) UV-vis spectra of  $\text{Ti}_3\text{C}_2\text{T}_x$  suspended in water with  $5 \text{ mg}\cdot\text{L}^{-1}$  free chlorine molar equivalent Fe(III) chloride ( $7.05 \times 10^{-5} \text{ M}$  Fe(III) chloride) over the course of 10 minutes. There is a clear change in UV-vis spectra of  $\text{Ti}_3\text{C}_2\text{T}_x$  after 10 min of exposure. (B) Representative photographs of  $\text{Ti}_3\text{C}_2\text{T}_x$  suspensions with 0 to  $50 \text{ mg}\cdot\text{L}^{-1}$  free chlorine molar equivalent Fe(III) chloride after 10 minutes. All samples were kept open to air at room temperature throughout the experimental timeframe. At a higher concentration,  $50 \text{ mg}\cdot\text{L}^{-1}$ , the solution becomes colorless in 10 minutes, and the MXenes precipitate out.

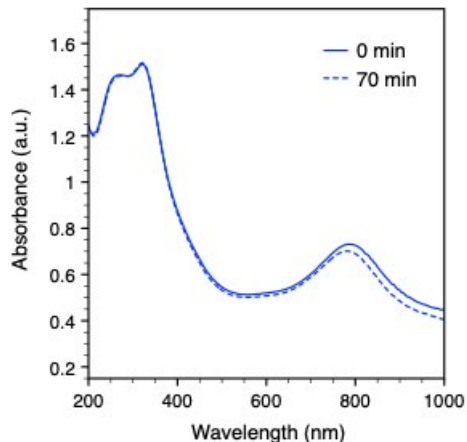

**Figure S11.** Reactivity of  $\text{Ti}_3\text{C}_2\text{T}_x$  with saturated oxygen. UV-vis spectra of  $\text{Ti}_3\text{C}_2\text{T}_x$  ( $25 \text{ mg}\cdot\text{L}^{-1}$ ) suspended in MQW with continuous bubbling of oxygen. The shape of the UV-Vis spectra did not change after 70 minutes of exposure to oxygen at room temperature, indicating that  $\text{Ti}_3\text{C}_2\text{T}_x$  was inert in the less oxidizing environment represented by an oxygen saturated solution ( $E_o = 0.40\text{V}$ )

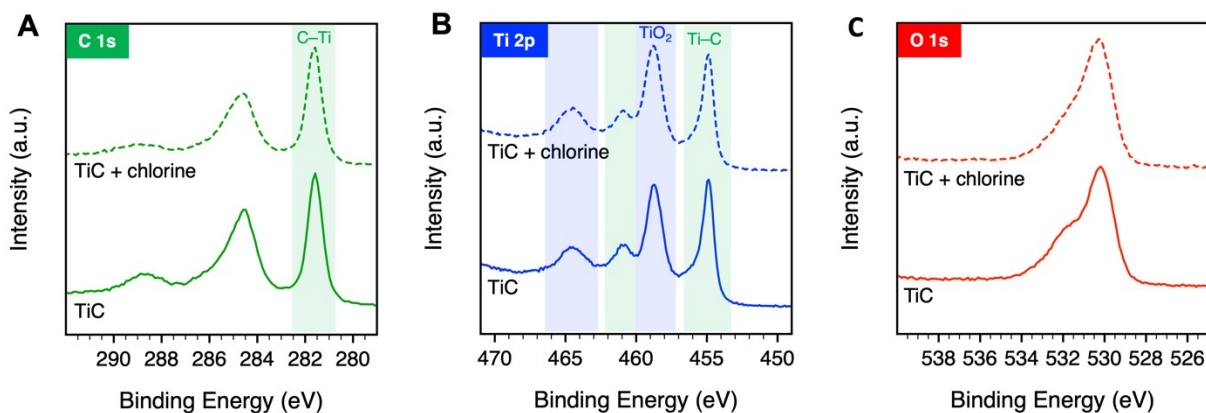

**Figure S12.** Reactivity of TiC with free chlorine. In these experiments, TiC suspended in phosphate buffer ( $25 \text{ mg}\cdot\text{L}^{-1}$ ) at pH 6 was exposed to free chlorine ( $50 \text{ mg}\cdot\text{L}^{-1}$ ) for up to 7 days. XPS spectra of (A) C 1s, (B) Ti 2p, and (C) O 1s regions of nanoscale TiC before and after exposure to  $50 \text{ mg}\cdot\text{L}^{-1}$  free chlorine for one day at pH 6 are shown.

## REFERENCES

- (1) Steven G. Bratsch. Standard Electrode Potentials and Temperature Coefficients in Water at 298.15K. *J. Phys. Chem. Ref. Data* **1989**, 18 (1).
- (2) Wang, D.; Bolton, J. R.; Hofmann, R. Medium Pressure UV Combined with Chlorine Advanced Oxidation for Trichloroethylene Destruction in a Model Water. *Water Res* **2012**, 4677–4686.
